# Supplementary material for: Electropolymerized phenol derivatives as permselective polymers for biosensor applications
Source: Royal Society of Chemistry journal article supplement (doi:10.1039/c5an00363f), 2015-01-01

## Electropolymerized phenol derivatives as permselective polymers for biosensor applications

Giammaria Calia,<sup>a,b</sup> Patrizia Monti,<sup>c</sup> Salvatore Marceddu,<sup>d</sup> Maria A. Dettori,<sup>c</sup> Davide Fabbri,<sup>c</sup> Samir Jaoua,<sup>e</sup> Robert D. O'Neill,<sup>f</sup> Pier A. Serra,<sup>\*b</sup> Giovanna Delogu,<sup>c</sup> and Quirico Migheli<sup>a</sup>

<sup>a</sup> Dipartimento di Agraria and Unità di Ricerca Istituto Nazionale di Biostrutture e Biosistemi, Università degli Studi di Sassari, Viale Italia 39, I-07100 Sassari, Italy.

<sup>b</sup> Dipartimento di Medicina Clinica e Sperimentale, Università degli Studi di Sassari, Viale S. Pietro 43/b, I-07100 Sassari, Italy.

<sup>c</sup> Istituto CNR di Chimica Biomolecolare - UOS Sassari - Traversa La Crucca 3, I-07100, Sassari, Italy.

<sup>d</sup> Istituto CNR di Scienze delle Produzioni Alimentari - UOS Sassari - Traversa La Crucca 3, I-07100, Sassari, Italy.

<sup>e</sup> Department of Biological & Environmental Sciences, College of Arts and Sciences, Qatar University, P.O. Box: 2713, Doha, Qatar.

<sup>f</sup> UCD School of Chemistry and Chemical Biology, University College Dublin, Belfield, Dublin 4, Ireland.

\*Corresponding author: E-mail Address: [paserra@uniss.it](mailto:paserra@uniss.it)

In the electronic supplementary information there are a cyclic voltammetry of *o*PD polymerized as described in the experimental section in the text; scanning electron microscope (SEM) at 5000 magnification of PPD electrodeposited onto Pt-Ir in CV and CPA at day1 and day 15; graphics of the linear slope of new polymers and permselectivity compared with PPD by day 1 to day 15; scanning electron microscope (SEM) at 5000 magnification for poly-eugenol, poly-isoeugenol, poly-dehydrodieugenol and poly-magnolol electrodeposited onto Pt-Ir in CV and CPA at day 15; NMR spectra of synthesised dehydrodieugenol; effect of pH on the AA / H<sub>2</sub>O<sub>2</sub> and DA / H<sub>2</sub>O<sub>2</sub> permselectivities (S%) of polyisoeugenol film electrosynthesised by means of CV.

**Figure S-1.** Cyclic voltammetry of *o*PD (10 mM) dissolved in PBS (pH 7.4) with scan speed of 20 mV/sec. A progressive lowering of the current is observed from the first to the fifth scan, as well as the formation of non-conductive polymers on the Pt-Ir surface.

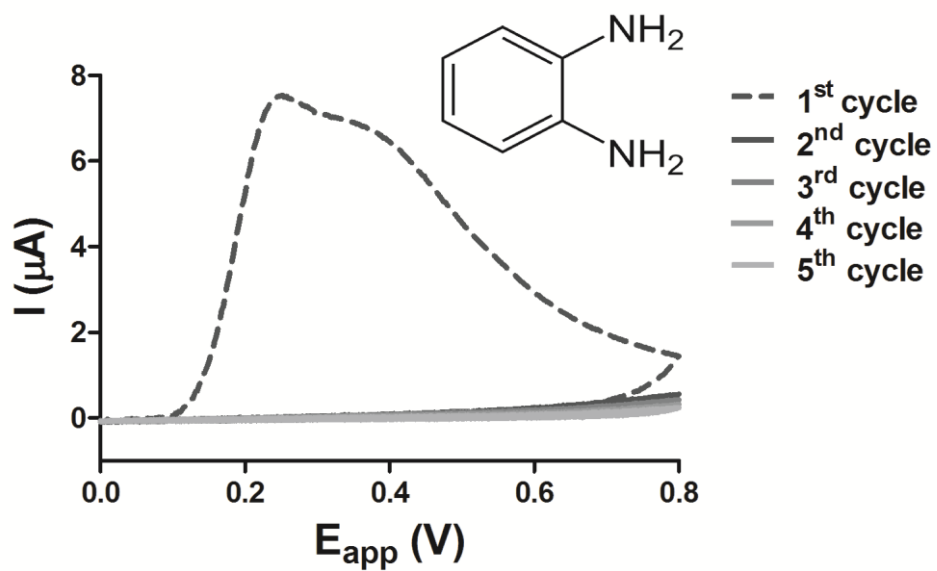

**Figure S-2.** Scanning electron microscope (SEM) at 5000 magnification of PPD electrodeposited onto Pt-Ir in CV (A-B) and CPA (C-D) at day1 (A-C) and day 15 (B-D).

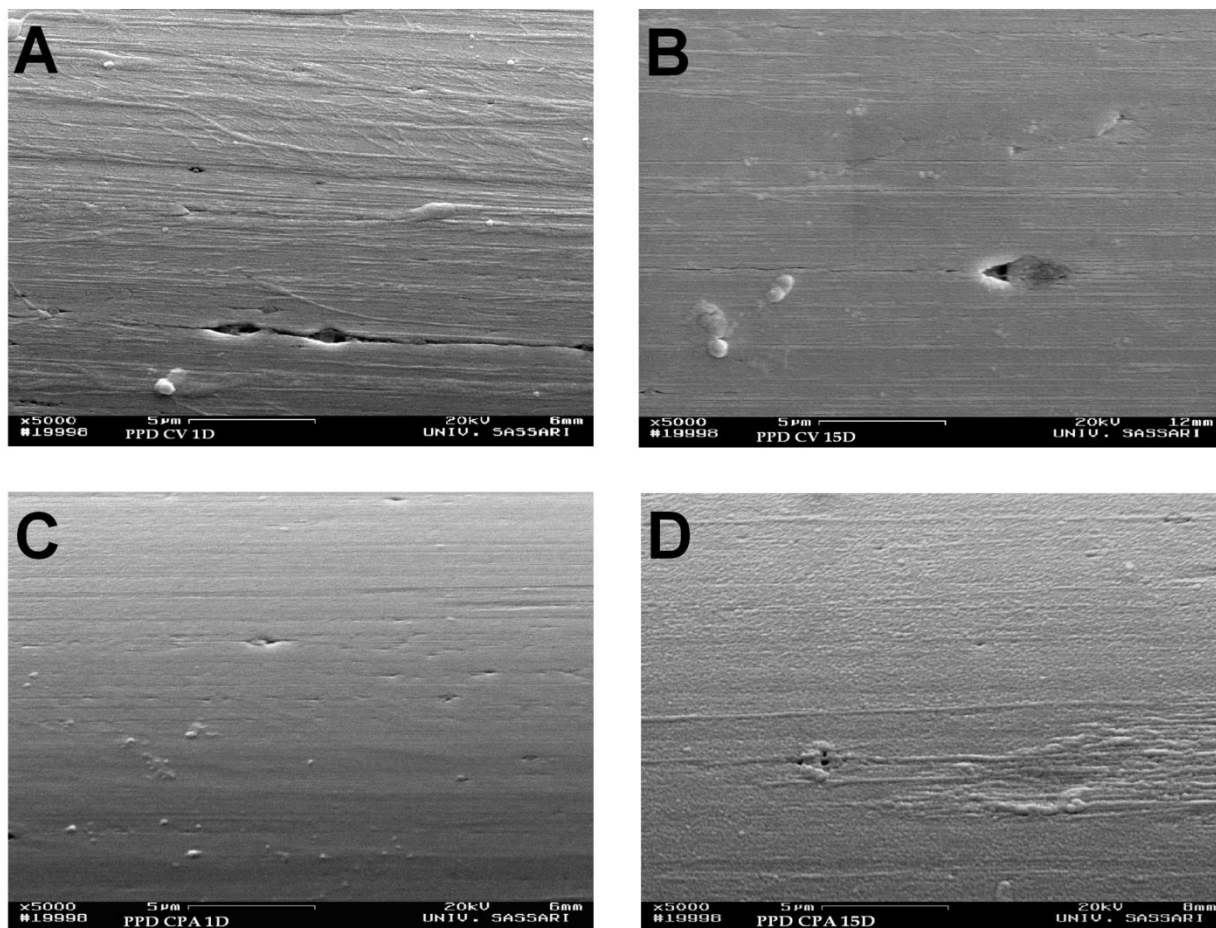

**Figure S-3.** The linear slope of new polymers and permselectivity compared with PPD by day 1 to day

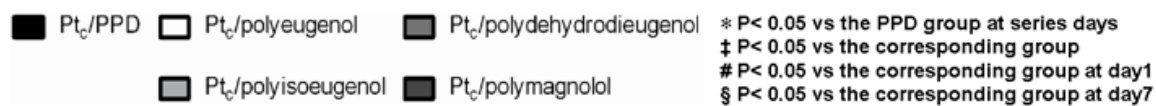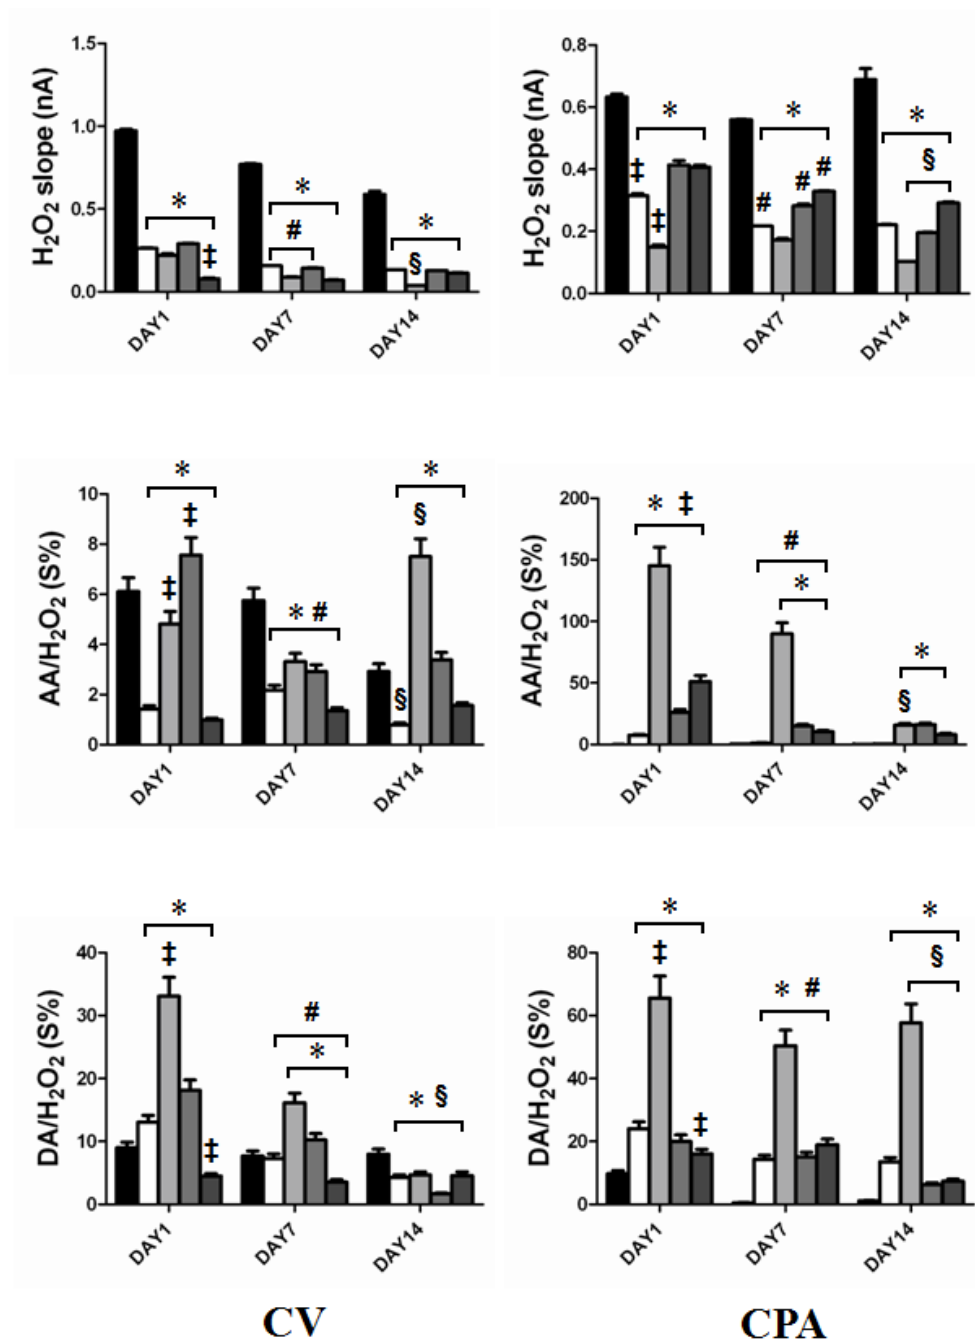

**Figure S-4.** Scanning electron microscope (SEM) at 5000 magnification for poly-eugenol, poly-isoeugenol, poly-dehydrodieugenol and poly-magnolol electrodeposited onto Pt-Ir in CV (A,C,E and G) and CPA (B,D,F and H) at day 15.

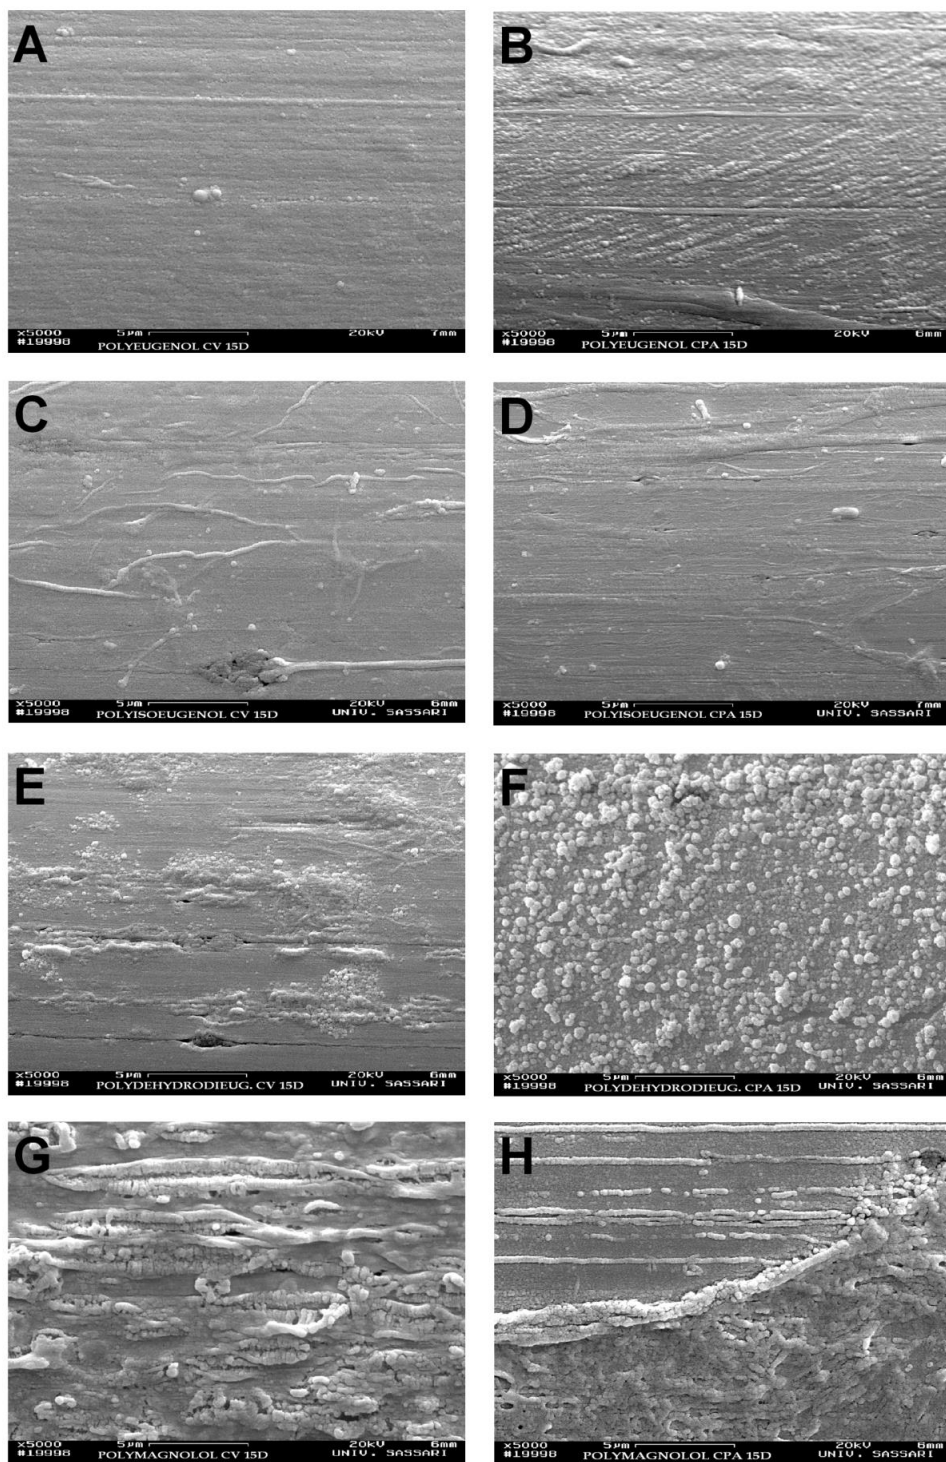

**Figure S-5.**  $^1\text{H}$  NMR (A) and  $^{13}\text{C}$  NMR (B) spectra of synthesised dehydrodieugenol recorded in  $\text{CDCl}_3$  solution at 399.93 MHz and 100.57 MHz, respectively (Varian Mercury Plus, Palo Alto, USA). a Varian VXR 5000 spectrometer.

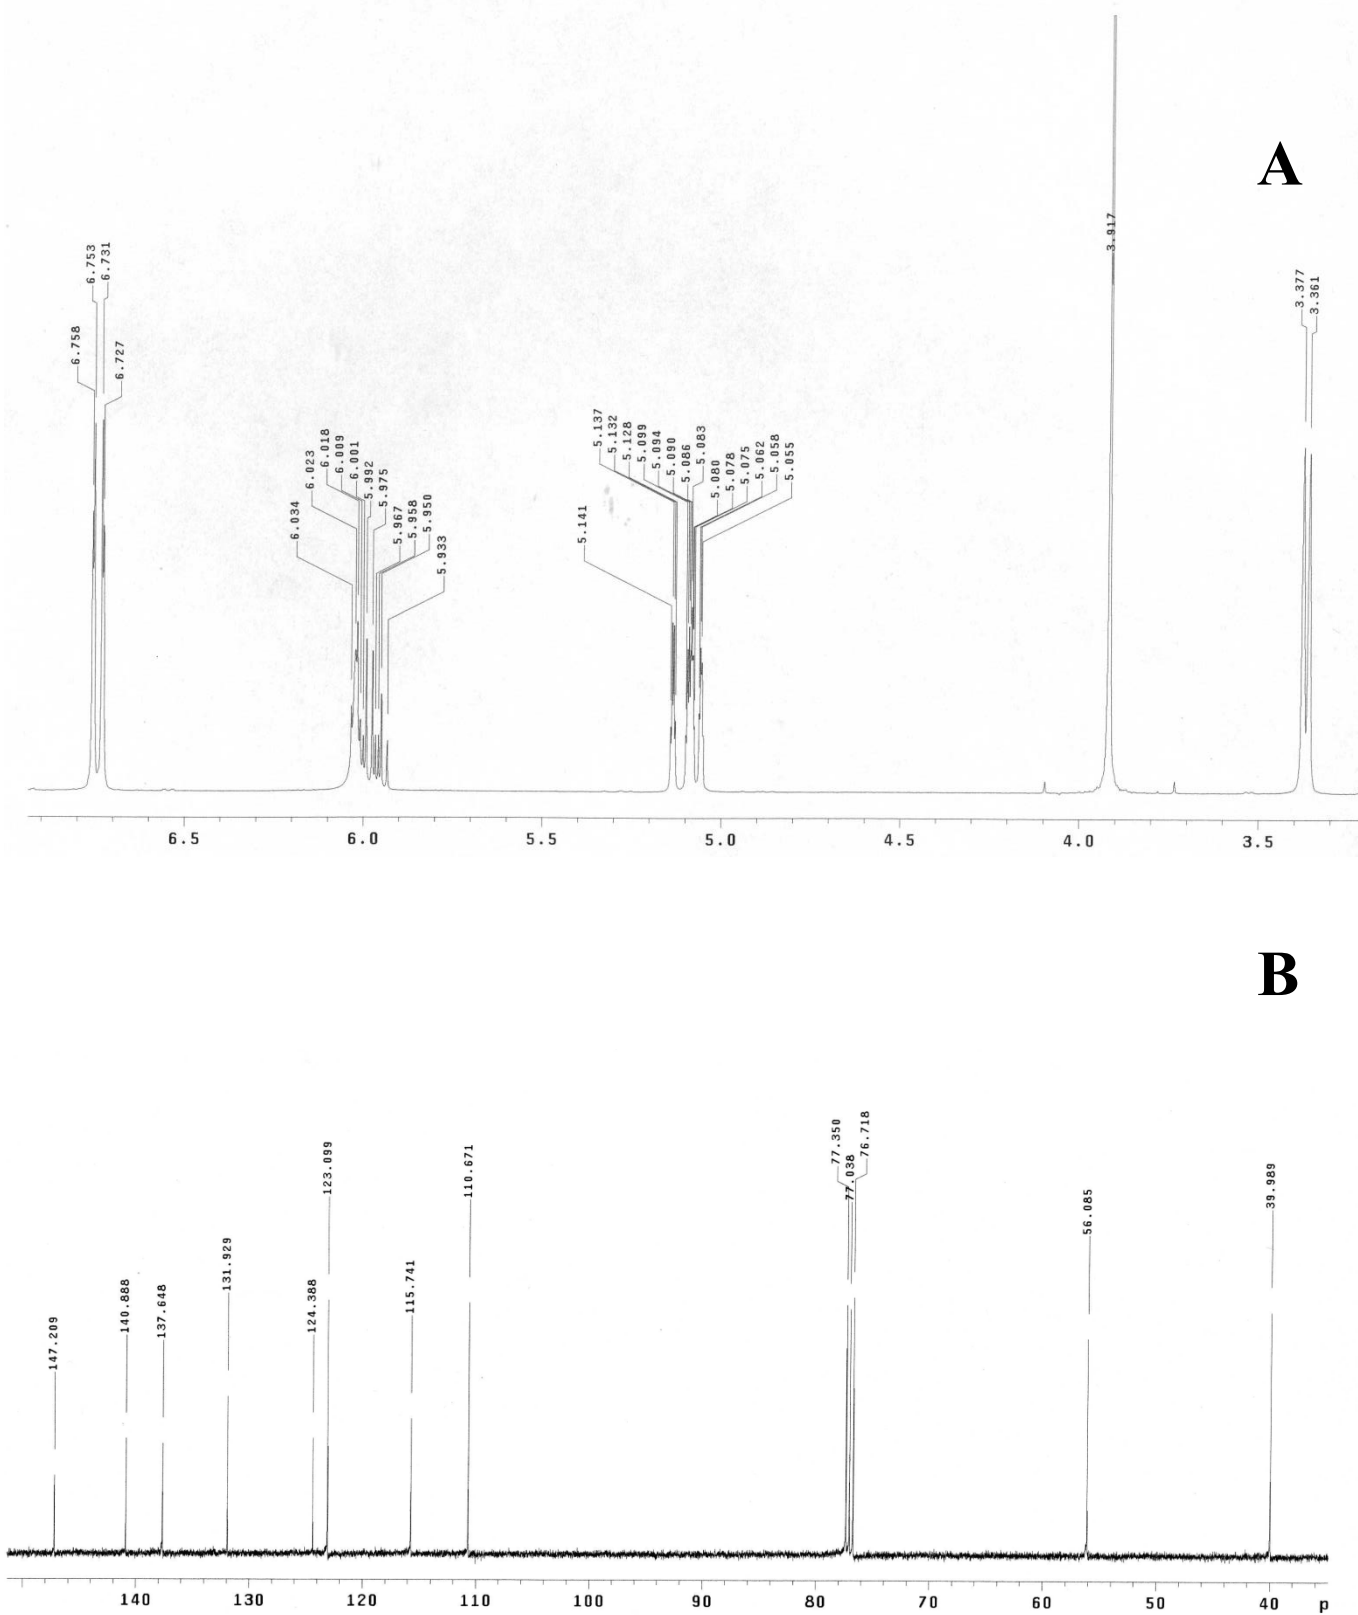

**Figure S-6.** Effect of pH on the AA / H<sub>2</sub>O<sub>2</sub> and DA / H<sub>2</sub>O<sub>2</sub> permselectivities (S%) of polyisoeugenol film electrosynthesised by means of CV.

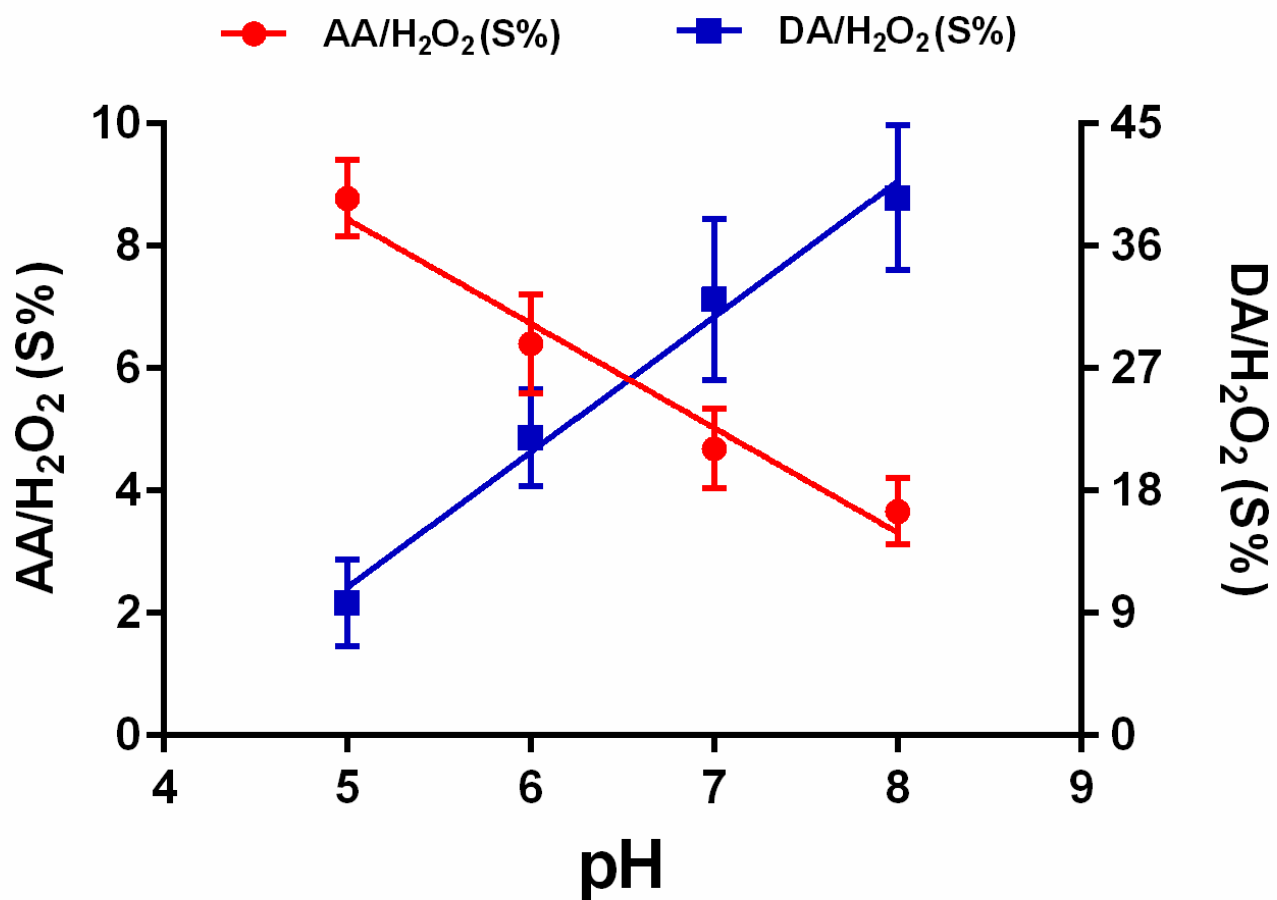

Supplement: c5an00363f1.pdf [file c5an00363f1.pdf]
